# Supplementary material
Source: PubMed Central journal article supplement (PMC4313279)
Supplement: JCM.01872-14_zjm999093836so1.pdf [file JCM.01872-14_zjm999093836so1.pdf]

Table S1: Species and  $\beta$ -Lactamase types of the strains tested as Meropenem resistant by Etest analysis

| No | Species               | Strain        | $\beta$ -Lactamase |
|----|-----------------------|---------------|--------------------|
| 1  | Klebsiella pneumoniae | B_dijk_12036  | KPC-2              |
| 2  | Klebsiella pneumoniae | BK AST 09     | KPC-2              |
| 3  | Klebsiella pneumoniae | H101700417    | KPC-2              |
| 4  | Klebsiella pneumoniae | H102180453    | KPC-2              |
| 5  | Klebsiella pneumoniae | H102620273    | KPC-2              |
| 6  | Klebsiella pneumoniae | H104080402    | KPC-2              |
| 7  | Klebsiella pneumoniae | H104140505    | KPC-2              |
| 8  | Klebsiella pneumoniae | H105180641    | KPC-2              |
| 9  | Klebsiella pneumoniae | H114340433    | KPC-2              |
| 10 | Klebsiella pneumoniae | NRZ_00103     | KPC-2              |
| 11 | Klebsiella pneumoniae | PEG 10_39_59  | KPC-2              |
| 12 | Klebsiella pneumoniae | R_dijk_5904   | KPC-2              |
| 13 | Klebsiella pneumoniae | R_dijk_6296   | KPC-2              |
| 14 | Klebsiella pneumoniae | B_dijk_12432  | KPC-3              |
| 15 | Klebsiella pneumoniae | B_dijk_13079  | KPC-3              |
| 16 | Klebsiella pneumoniae | ESBL_1        | KPC-3              |
| 17 | Klebsiella pneumoniae | KPC_1         | KPC-3              |
| 18 | Klebsiella pneumoniae | KPC_2         | KPC-3              |
| 19 | Klebsiella pneumoniae | KPC_3         | KPC-3              |
| 20 | Klebsiella pneumoniae | KPC_4         | KPC-3              |
| 21 | Klebsiella pneumoniae | KPC_5         | KPC-3              |
| 22 | Klebsiella pneumoniae | KPC_6         | KPC-3              |
| 23 | Klebsiella pneumoniae | ESBL_778      | KPC-2              |
| 24 | Klebsiella pneumoniae | 6391 PIM KPC+ | KPC-2              |
| 25 | Klebsiella pneumoniae | 6737 PIM KPC+ | KPC-3              |
| 26 | Klebsiella pneumoniae | PEG 10_52_68  | KPC-3              |
| 27 | Klebsiella pneumoniae | PEG 10_52_71  | KPC-3              |
| 28 | Klebsiella pneumoniae | PEG 10_90_74  | KPC-3              |
| 29 | Klebsiella pneumoniae | 130219_01     | NDM-1              |
| 30 | Klebsiella pneumoniae | NRZ_00313     | NDM-1              |
| 31 | Klebsiella pneumoniae | H110560551    | OXA-48             |
| 32 | Klebsiella pneumoniae | H112340706    | OXA-48             |
| 33 | Klebsiella pneumoniae | H114460314    | OXA-48             |
| 34 | Klebsiella pneumoniae | NRZ_00002     | OXA-48             |
| 35 | Klebsiella pneumoniae | PEG 10_48_8   | OXA-48             |
| 36 | Klebsiella pneumoniae | PEG 10_102_31 | VIM-4              |
