# Supplementary material
Source: PubMed Central journal article supplement (PMC4313279)
Supplement: JCM.01872-14_zjm999093836so2.pdf [file JCM.01872-14_zjm999093836so2.pdf]

Table S2: Origin of the different test strains

| <b>Origin</b> | <b>No. Susceptible</b> | <b>No. Resistant</b> | <b>No. Total</b> |
|---------------|------------------------|----------------------|------------------|
| Germany       | 58                     | 11                   | 69               |
| USA           | <b>7</b>               | <b>8</b>             | 15               |
| England       | 0                      | 11                   | 11               |
| Netherland    | <b>0</b>               | <b>6</b>             | 6                |
| Belgique      | 5                      | 0                    | 5                |
| France        | 2                      | 0                    | 2                |
